# Supplementary material
Source: PubMed Central journal article supplement (PMC4576074)
Supplement: AAC.00689-15_zac010154466so1.pdf [file AAC.00689-15_zac010154466so1.pdf]

## Supplemental Figure 1

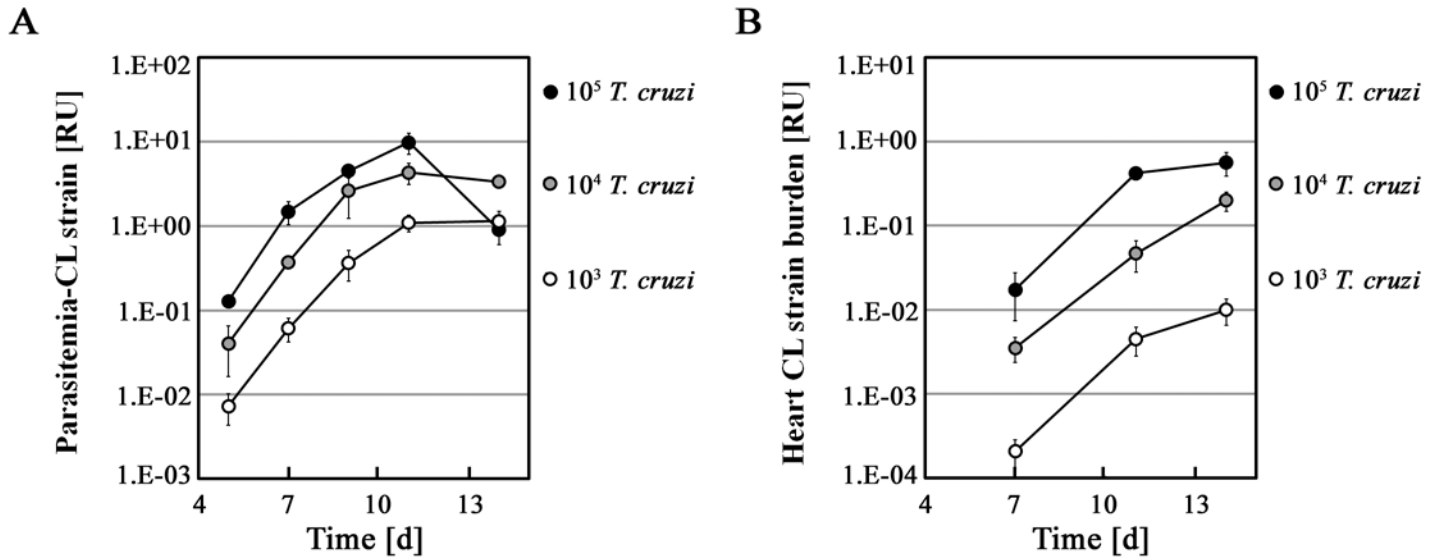

Time course of *T. cruzi* proliferation in infected C57BL/6 mice during early acute phase. Mice (n=5 per treatment group) were infected with indicated number of *T. cruzi* CL strain trypomastigotes, and, at indicated time points, parasitemia (A) and heart parasite burden (B) were quantified by quantitative PCR. Average parasitemia/parasite burden values are shown together with standard errors.
